# Supplementary material for: Role of goblet cell protein CLCA1 in murine DSS colitis
Source: Springer Nature journal article supplement (doi:10.1186/s12950-016-0113-8), 2016-02-04
Supplement: MOESM3 [file 9763734]

### Additional file 3: Quantitative RT-PCR – primer and probe sequences

| Gene                          | Genbank<br>Accession no. | Oligonucleotide Sequences (5'-3')                                                                                                             | Reference   |
|-------------------------------|--------------------------|-----------------------------------------------------------------------------------------------------------------------------------------------|-------------|
| <i>Cxcl1(KC)</i>              | NM_008176.3              | Primer (upstream) GATGCTAAAAGGTGTCCCA<br>Primer (downstream)AGACTGCTCTGATGGCACCT<br>TaqMan Probe FAM-GTCAGAAGCCAGCGTTCAC-BHQ                  | *           |
| <i>Cxcl2(MIP-2a)</i>          | NM_009140.2              | Primer (upstream) CTGAACAAAGGCAAGGCTAACT<br>Primer (downstream)ACCTGGAAAGGAGGACCT<br>TaqMan Probe FAM-CTTTGGTTCTTCCGTTGAGG-BHQ                | *           |
| <i>Il-17</i>                  | NM_010552                | Primer (upstream) GCTCCAGAAGGCCCTCAGA<br>Primer (downstream)CTCTCCACCGCAATGAAGACCTGA<br>TaqMan Probe FAM-AGCTTTCCTCCGCATTGA-BHQ               | [1]         |
| <i>TNF</i>                    | NM_013693.3              | Primer (upstream) CATCTTCTCAAAATTCGAGTGACAA<br>Primer (downstream)TGGGAGTAGACAAGGTACAACCC<br>TaqMan Probe FAM-CACGTCGTAGCAAACCACCAAGTGGA-BHQ* | [2]         |
| <i>INF<math>\gamma</math></i> | NM_008337.3              | Primer (upstream) GAACTGGCAAAAGGATGGTGAC<br>Primer (downstream)GTTGCTGATGGCCTGATTGTC<br>TaqMan Probe FAM-TGAAAATCCTGCAGAGCCAGA-BHQ*           | ID 8139 [3] |
| <i>Tff3</i>                   | NM_011575.2              | Primer (upstream) TAATGCTGTTGGTGGTCTCTG<br>Primer (downstream)CAGCCACGGTTGTACTG<br>TaqMan Probe FAM-ATGTCAGAGTGGACTGTGGCTAC-BHQ               | *           |
| <i>E-Cad (Cdh1)</i>           | NM_009864.2              | Primer (upstream) GGCTTCAGTTCCGAGGTCTA<br>Primer (downstream)AGTCTTCCGAAAAGAAGGCTG<br>TaqMan Probe FAM-TCCTGGGCAGAGTGAGATTT -BHQ              | *           |
| <i>Ef-1a</i>                  | NM_010106.2              | Primer (upstream) AAAAACGACCCACCAATGG<br>Primer (downstream)GGCCTGGATGGTTCAGGATA<br>TaqMan Probe FAM- AGCAGCTGGCTTCACGCTCAGGTG -BHQ           | [4]         |
| <i>B2m</i>                    | NM_009735.3              | Primer (upstream) ATTCACCCCACTGAGACTGA<br>Primer (downstream)CTCGATCCCAGTAGACGGTC<br>TaqMan Probe FAM-TGCAGAGTTAAGCATGACAGTATGGCCG -BHQ       | [5]         |
| <i>Gapdh</i>                  | NM_008084.2              | Primer (upstream) TCACCACCATGGAGAAGG<br>Primer (downstream)GCTAAGCAGTTGGTGGTGCA<br>TaqMan Probe FAM-ATGCCCCCATGTTTGTGATGGGTGT-BHQ             | [1]         |

\*Primers and/or probes designed by authors.

## References

1. Giulietti A, Overbergh L, Valckx D, Decallonne B, Bouillon R, Mathieu C: **An overview of real-time quantitative PCR: applications to quantify cytokine gene expression.** *Methods* 2001, **25**:386-401.
2. Innamorato NG, Rojo AI, Garcia-Yague AJ, Yamamoto M, de Ceballos ML, Cuadrado A: **The transcription factor Nrf2 is a therapeutic target against brain inflammation.** *J Immunol* 2008, **181**:680-689.
3. Pattyn F, Robbrecht P, De Paepe A, Speleman F, Vandesompele J: **RTPPrimerDB: the real-time PCR primer and probe database, major update 2006.** *Nucleic Acids Res* 2006, **34**:D684-688.
4. Braun J, Mundhenk L, Range F, Gruber AD: **Quantitative expression analyses of candidates for alternative anion conductance in cystic fibrosis mouse models.** *J Cyst Fibros* 2010, **9**:351-364.
5. Norris MD, Burkhart CA, Marshall GM, Weiss WA, Haber M: **Expression of N-myc and MRP genes and their relationship to N-myc gene dosage and tumor formation in a murine neuroblastoma model.** *Med Pediatr Oncol* 2000, **35**:585-589.
