# Supplementary material for: Role of goblet cell protein CLCA1 in murine DSS colitis
Source: Springer Nature journal article supplement (doi:10.1186/s12950-016-0113-8), 2016-02-04
Supplement: MOESM4 [file 9763734]

**Additional file 4: Results of histopathology scoring of 24 and 48 h-groups**

|                                     | <i>Clca1</i> <sup>-/-</sup> 24 h DSS proximal colon |   |   |   |   |   |   |   |   |    | <i>Clca1</i> <sup>-/-</sup> 24 h DSS distal colon |   |   |   |   |   |   |   |   |    |
|-------------------------------------|-----------------------------------------------------|---|---|---|---|---|---|---|---|----|---------------------------------------------------|---|---|---|---|---|---|---|---|----|
|                                     | 1                                                   | 2 | 3 | 4 | 5 | 6 | 7 | 8 | 9 | 10 | 1                                                 | 2 | 3 | 4 | 5 | 6 | 7 | 8 | 9 | 10 |
| Cell type score neutrophils         | 0                                                   | 0 | 1 | 0 | 0 | 0 | 0 | 0 | 0 | 0  | 0                                                 | 0 | 0 | 0 | 0 | 0 | 0 | 0 | 0 | 0  |
| Cell type score macrophages         | 0                                                   | 0 | 0 | 0 | 1 | 0 | 0 | 0 | 0 | 0  | 0                                                 | 0 | 0 | 0 | 0 | 0 | 0 | 0 | 0 | 0  |
| Cell type score lymphocytes         | 0                                                   | 0 | 0 | 1 | 2 | 0 | 0 | 0 | 0 | 0  | 0                                                 | 0 | 0 | 0 | 0 | 0 | 0 | 0 | 0 | 0  |
| Erosion/ulceration - depth          | 0                                                   | 0 | 0 | 0 | 0 | 0 | 0 | 0 | 0 | 0  | 0                                                 | 0 | 0 | 0 | 0 | 0 | 0 | 0 | 0 | 0  |
| Erosion/ulceration - extent         | 0                                                   | 0 | 0 | 0 | 0 | 0 | 0 | 0 | 0 | 0  | 0                                                 | 0 | 0 | 0 | 0 | 0 | 0 | 0 | 0 | 0  |
| Immune cell infiltration - presence | 0                                                   | 0 | 0 | 0 | 0 | 0 | 0 | 0 | 0 | 0  | 0                                                 | 0 | 0 | 0 | 0 | 0 | 0 | 0 | 0 | 0  |
| Immune cell infiltration - extent   | 0                                                   | 0 | 0 | 0 | 0 | 0 | 0 | 0 | 0 | 0  | 0                                                 | 0 | 0 | 0 | 0 | 0 | 0 | 0 | 0 | 0  |
| Regeneration                        | 0                                                   | 0 | 0 | 0 | 0 | 0 | 0 | 0 | 0 | 0  | 0                                                 | 0 | 0 | 0 | 0 | 0 | 0 | 0 | 0 | 0  |

|                                     | WT 24 h DSS proximal colon |   |   |   |   |   |   |   |   |    | WT 24 h DSS distal colon |   |   |   |   |   |   |   |   |    |
|-------------------------------------|----------------------------|---|---|---|---|---|---|---|---|----|--------------------------|---|---|---|---|---|---|---|---|----|
|                                     | 1                          | 2 | 3 | 4 | 5 | 6 | 7 | 8 | 9 | 10 | 1                        | 2 | 3 | 4 | 5 | 6 | 7 | 8 | 9 | 10 |
| Cell type score neutrophils         | 0                          | 0 | 0 | 0 | 0 | 0 | 0 | 0 | 0 | 0  | 0                        | 0 | 0 | 0 | 0 | 0 | 0 | 0 | 0 | 0  |
| Cell type score macrophages         | 0                          | 0 | 0 | 0 | 0 | 0 | 0 | 0 | 1 | 0  | 0                        | 0 | 0 | 0 | 0 | 0 | 0 | 0 | 0 | 0  |
| Cell type score lymphocytes         | 0                          | 0 | 0 | 1 | 0 | 0 | 0 | 1 | 1 | 1  | 0                        | 0 | 0 | 1 | 1 | 0 | 0 | 0 | 0 | 1  |
| Erosion/ulceration - depth          | 0                          | 0 | 0 | 0 | 0 | 0 | 0 | 0 | 0 | 0  | 0                        | 0 | 0 | 0 | 0 | 0 | 0 | 0 | 0 | 0  |
| Erosion/ulceration - extent         | 0                          | 0 | 0 | 0 | 0 | 0 | 0 | 0 | 0 | 0  | 0                        | 0 | 0 | 0 | 0 | 0 | 0 | 0 | 0 | 0  |
| Immune cell infiltration - presence | 0                          | 0 | 0 | 0 | 0 | 0 | 0 | 0 | 0 | 0  | 0                        | 0 | 0 | 0 | 0 | 0 | 0 | 0 | 0 | 0  |
| Immune cell infiltration - extent   | 0                          | 0 | 0 | 0 | 0 | 0 | 0 | 0 | 0 | 0  | 0                        | 0 | 0 | 0 | 0 | 0 | 0 | 0 | 0 | 0  |
| Regeneration                        | 0                          | 0 | 0 | 0 | 0 | 0 | 0 | 0 | 0 | 0  | 0                        | 0 | 0 | 0 | 0 | 0 | 0 | 0 | 0 | 0  |

|                                     | <i>Clca1</i> <sup>-/-</sup> 48 h DSS proximal colon |   |   |   |   |   |   |   |   |    | <i>Clca1</i> <sup>-/-</sup> 48 h DSS distal colon |   |   |   |   |   |   |   |   |    |
|-------------------------------------|-----------------------------------------------------|---|---|---|---|---|---|---|---|----|---------------------------------------------------|---|---|---|---|---|---|---|---|----|
|                                     | 1                                                   | 2 | 3 | 4 | 5 | 6 | 7 | 8 | 9 | 10 | 1                                                 | 2 | 3 | 4 | 5 | 6 | 7 | 8 | 9 | 10 |
| Cell type score neutrophils         | 0                                                   | 0 | 0 | 0 | 0 | 2 | 0 | 0 | 0 | 0  | 0                                                 | 0 | 0 | 0 | 0 | 0 | 0 | 0 | 0 | 0  |
| Cell type score macrophages         | 0                                                   | 0 | 1 | 0 | 0 | 0 | 0 | 0 | 0 | 0  | 0                                                 | 0 | 0 | 0 | 0 | 0 | 0 | 0 | 0 | 0  |
| Cell type score lymphocytes         | 0                                                   | 0 | 0 | 0 | 0 | 0 | 0 | 0 | 0 | 0  | 0                                                 | 0 | 0 | 0 | 0 | 0 | 0 | 1 | 0 | 0  |
| Erosion/ulceration - depth          | 0                                                   | 0 | 0 | 0 | 0 | 0 | 0 | 0 | 0 | 0  | 0                                                 | 0 | 0 | 0 | 0 | 0 | 0 | 0 | 0 | 0  |
| Erosion/ulceration - extent         | 0                                                   | 0 | 0 | 0 | 0 | 0 | 0 | 0 | 0 | 0  | 0                                                 | 0 | 0 | 0 | 0 | 0 | 0 | 0 | 0 | 0  |
| Immune cell infiltration - presence | 0                                                   | 0 | 0 | 0 | 0 | 0 | 0 | 0 | 0 | 0  | 0                                                 | 0 | 0 | 0 | 0 | 0 | 0 | 0 | 0 | 0  |
| Immune cell infiltration - extent   | 0                                                   | 0 | 0 | 0 | 0 | 0 | 0 | 0 | 0 | 0  | 0                                                 | 0 | 0 | 0 | 0 | 0 | 0 | 0 | 0 | 0  |
| Regeneration                        | 0                                                   | 0 | 0 | 0 | 0 | 0 | 0 | 0 | 0 | 0  | 0                                                 | 0 | 0 | 0 | 0 | 0 | 0 | 0 | 0 | 0  |

|                                     | WT 48 h DSS proximal colon |   |   |   |   |   |   |   |   |    | WT 48 h DSS distal colon |   |   |   |   |   |   |   |   |    |
|-------------------------------------|----------------------------|---|---|---|---|---|---|---|---|----|--------------------------|---|---|---|---|---|---|---|---|----|
|                                     | 1                          | 2 | 3 | 4 | 5 | 6 | 7 | 8 | 9 | 10 | 1                        | 2 | 3 | 4 | 5 | 6 | 7 | 8 | 9 | 10 |
| Cell type score neutrophils         | 0                          | 0 | 0 | 0 | 0 | 0 | 0 | 0 | 0 | 0  | 0                        | 0 | 0 | 0 | 0 | 0 | 0 | 1 | 0 | 0  |
| Cell type score macrophages         | 0                          | 0 | 0 | 0 | 0 | 0 | 0 | 0 | 0 | 0  | 0                        | 0 | 0 | 0 | 0 | 0 | 0 | 0 | 0 | 0  |
| Cell type score lymphocytes         | 0                          | 0 | 1 | 2 | 0 | 0 | 0 | 0 | 0 | 0  | 2                        | 0 | 0 | 0 | 0 | 0 | 0 | 1 | 0 | 0  |
| Erosion/ulceration - depth          | 0                          | 0 | 0 | 0 | 0 | 0 | 0 | 0 | 0 | 0  | 0                        | 0 | 0 | 0 | 0 | 0 | 0 | 0 | 0 | 0  |
| Erosion/ulceration - extent         | 0                          | 0 | 0 | 0 | 0 | 0 | 0 | 0 | 0 | 0  | 0                        | 0 | 0 | 0 | 0 | 0 | 0 | 0 | 0 | 0  |
| Immune cell infiltration - presence | 0                          | 0 | 0 | 0 | 0 | 0 | 0 | 0 | 0 | 0  | 0                        | 0 | 0 | 0 | 0 | 0 | 0 | 0 | 0 | 0  |
| Immune cell infiltration - extent   | 0                          | 0 | 0 | 0 | 0 | 0 | 0 | 0 | 0 | 0  | 0                        | 0 | 0 | 0 | 0 | 0 | 0 | 0 | 0 | 0  |
| Regeneration                        | 0                          | 0 | 0 | 0 | 0 | 0 | 0 | 0 | 0 | 0  | 0                        | 0 | 0 | 0 | 0 | 0 | 0 | 0 | 0 | 0  |
